# Supplementary material
Source: MDPI journal article supplement (https://www.mdpi.com/2035-8377/13/4/63)

### Supplemental file 1.1 The risk of bias assessment.

| Study                 | External validity                                                                                                      |                                                                                  |                                                                                          |                                                 | Internal validity                                                       |                                                      |                                                                                                          |                                                             |                                                                                             |                                                                                      |                                                |
|-----------------------|------------------------------------------------------------------------------------------------------------------------|----------------------------------------------------------------------------------|------------------------------------------------------------------------------------------|-------------------------------------------------|-------------------------------------------------------------------------|------------------------------------------------------|----------------------------------------------------------------------------------------------------------|-------------------------------------------------------------|---------------------------------------------------------------------------------------------|--------------------------------------------------------------------------------------|------------------------------------------------|
|                       | Was the study's target population a close representation of the national population in relation to relevant variables? | Was the sampling frame a true or close representation of the target population ? | Was some form of random selection used to select the sample, OR was a census undertaken? | Was the likelihood of nonresponse bias minimal? | Were data collected directly from the subjects (as opposed to a proxy)? | Was an acceptable case definition used in the study? | Was the study instrument that measured the parameter of interest shown to have validity and reliability? | Was the same mode of data collection used for all subjects? | Was the length of the shortest prevalence period for the parameter of interest appropriate? | Were the numerator (s) and denominator(s) for the parameter of interest appropriate? | Summary item on the overall risk of study bias |
| Marino et al, 2016    | Yes                                                                                                                    | Yes                                                                              | Yes                                                                                      | Yes                                             | Yes                                                                     | Yes                                                  | Yes                                                                                                      | Yes                                                         | Yes                                                                                         | NA                                                                                   | Minor                                          |
| Gaudron et al, 2014   | Yes                                                                                                                    | Yes                                                                              | Yes                                                                                      | Yes                                             | Yes                                                                     | Yes                                                  | Yes                                                                                                      | Yes                                                         | Yes                                                                                         | NA                                                                                   | Minor                                          |
| Zhang et al, 2012     | Yes                                                                                                                    | Yes                                                                              | Yes                                                                                      | Yes                                             | Yes                                                                     | Yes                                                  | Yes                                                                                                      | Yes                                                         | Yes                                                                                         | NA                                                                                   | Minor                                          |
| Knebel et al, 2009    | Yes                                                                                                                    | Yes                                                                              | Yes                                                                                      | Yes                                             | Yes                                                                     | Yes                                                  | Yes                                                                                                      | Yes                                                         | Yes                                                                                         | NA                                                                                   | Minor                                          |
| de Bruijn et al, 2006 | Yes                                                                                                                    | Yes                                                                              | Yes                                                                                      | Yes                                             | Yes                                                                     | Yes                                                  | Yes                                                                                                      | Yes                                                         | Yes                                                                                         | NA                                                                                   | Minor                                          |
| Blum et al, 2004      | Yes                                                                                                                    | Yes                                                                              | No                                                                                       | Yes                                             | Yes                                                                     | Yes                                                  | Yes                                                                                                      | Yes                                                         | Yes                                                                                         | NA                                                                                   | Moderate                                       |
| de Abreu et al, 2008  | Yes                                                                                                                    | Yes                                                                              | No                                                                                       | Yes                                             | Yes                                                                     | Yes                                                  | Yes                                                                                                      | Yes                                                         | Yes                                                                                         | NA                                                                                   | Moderate                                       |
| Harloff et al, 2005   | Yes                                                                                                                    | Yes                                                                              | Yes                                                                                      | Yes                                             | Yes                                                                     | Yes                                                  | Yes                                                                                                      | Yes                                                         | Yes                                                                                         | NA                                                                                   | Minor                                          |
| Shyu et al, 1993      | Yes                                                                                                                    | Yes                                                                              | Yes                                                                                      | Yes                                             | Yes                                                                     | Yes                                                  | Yes                                                                                                      | Yes                                                         | Yes                                                                                         | NA                                                                                   | Minor                                          |
| Rauth et al, 1996     | Yes                                                                                                                    | Yes                                                                              | Yes                                                                                      | Yes                                             | Yes                                                                     | Yes                                                  | Yes                                                                                                      | Yes                                                         | Yes                                                                                         | NA                                                                                   | Minor                                          |
| Cujec et al, 1991     | Yes                                                                                                                    | Yes                                                                              | Yes                                                                                      | Yes                                             | Yes                                                                     | Yes                                                  | Yes                                                                                                      | Yes                                                         | Yes                                                                                         | NA                                                                                   | Minor                                          |
| Pop et al, 1990       | Yes                                                                                                                    | Yes                                                                              | Yes                                                                                      | Yes                                             | Yes                                                                     | Yes                                                  | Yes                                                                                                      | Yes                                                         | Yes                                                                                         | NA                                                                                   | Minor                                          |
| Pearson et al, 1991   | Yes                                                                                                                    | Yes                                                                              | No                                                                                       | Yes                                             | Yes                                                                     | Yes                                                  | Yes                                                                                                      | Yes                                                         | Yes                                                                                         | NA                                                                                   | Moderate                                       |
| Censori et al, 1998   | Yes                                                                                                                    | Yes                                                                              | No                                                                                       | Yes                                             | Yes                                                                     | Yes                                                  | Yes                                                                                                      | Yes                                                         | Yes                                                                                         | NA                                                                                   | Moderate                                       |
| Retting et al, 2008   | Yes                                                                                                                    | Yes                                                                              | No                                                                                       | Yes                                             | Yes                                                                     | Yes                                                  | Yes                                                                                                      | Yes                                                         | Yes                                                                                         | NA                                                                                   | Moderate                                       |

Hoy et al., Assessing risk of bias in prevalence studies: modification of an existing tool and evidence of interrater agreement. Journal of Clinical Epidemiology. 65 (2012) 934e939

**Supplemental file 1.2: Forest plot of proportion of additional cardiac findings on TEE.**

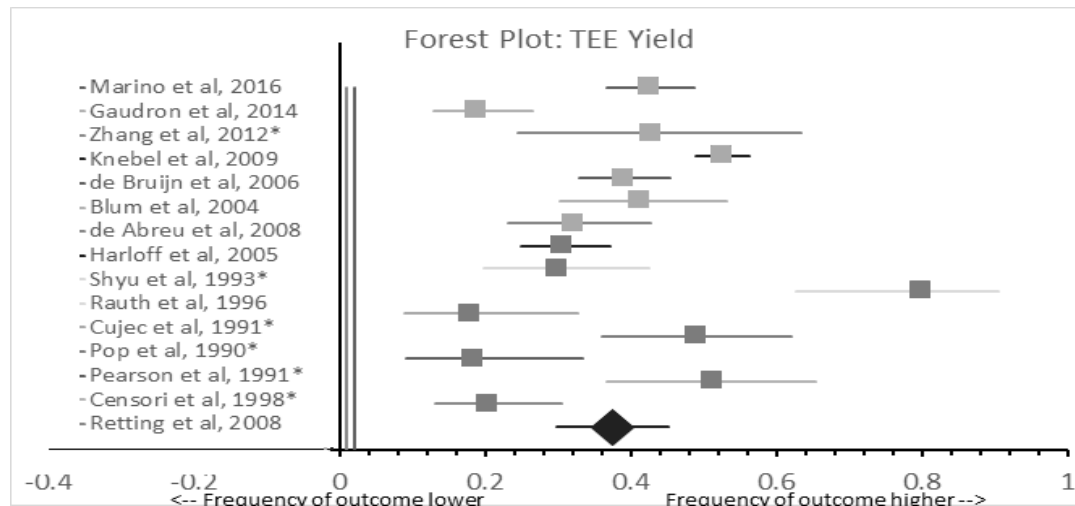

**Supplemental file 1.3: Forest plot of proportion of cardiac abnormalities that did change management.**

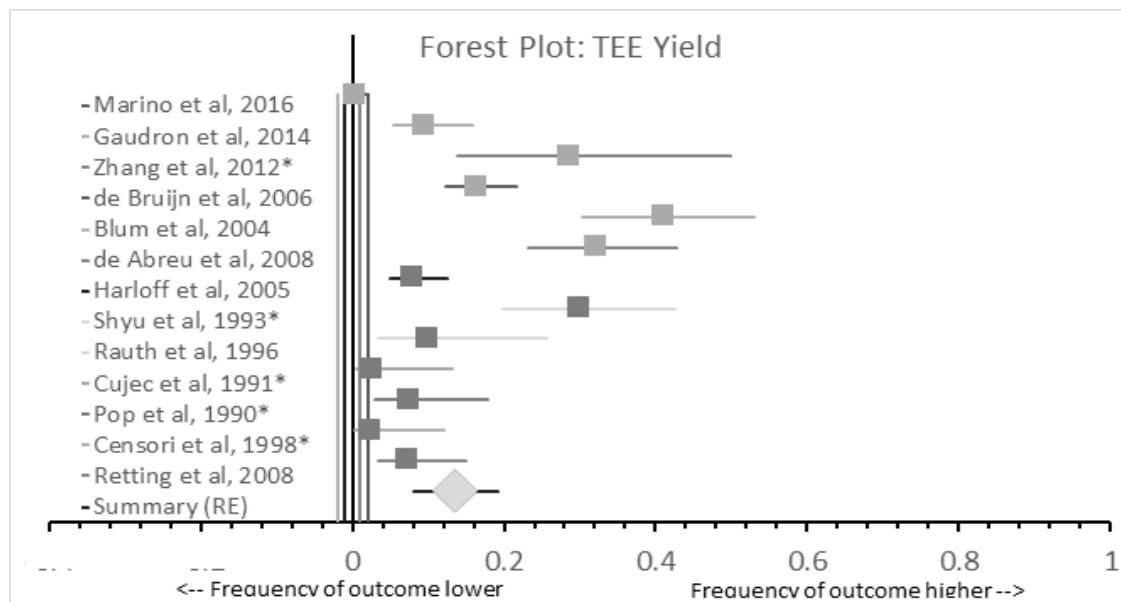

**Supplemental file 1.4: Forest plot of proportion of cardiac abnormalities that should change management.**

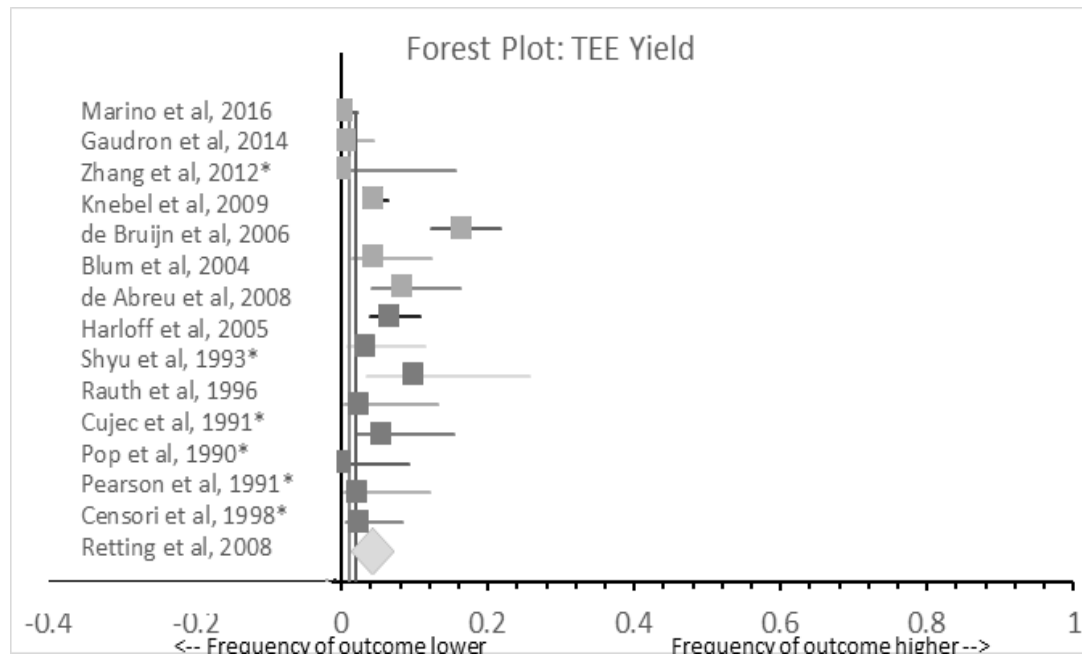

**Supplemental file 1.5: Forest plot of proportion of cardiac abnormalities that could change management.**

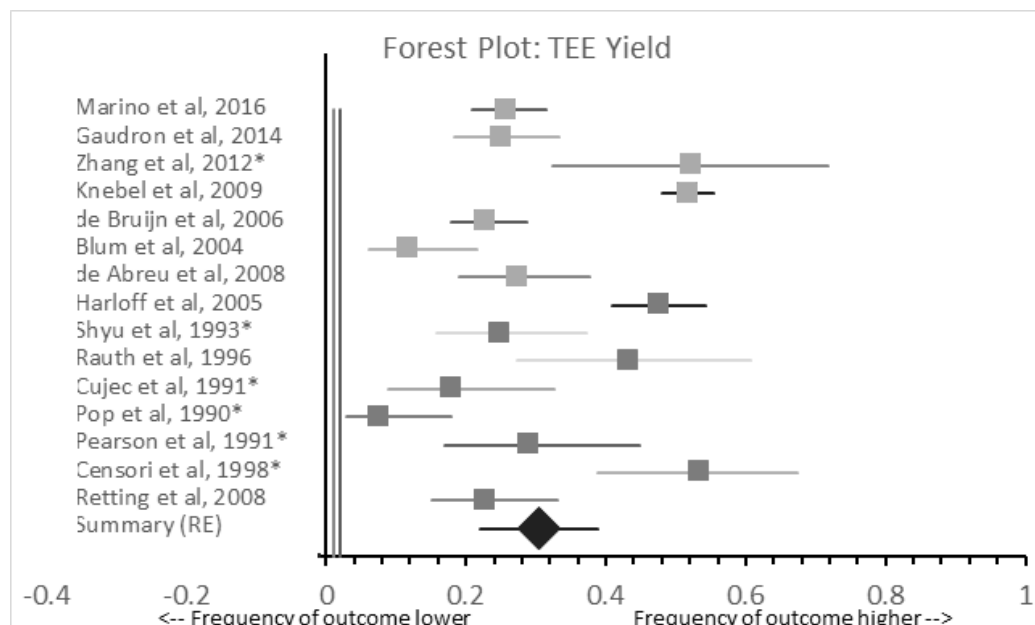

**Supplemental file 1.6: Forest plot of proportion of additional cardiac findings on TEE in class II studies.**

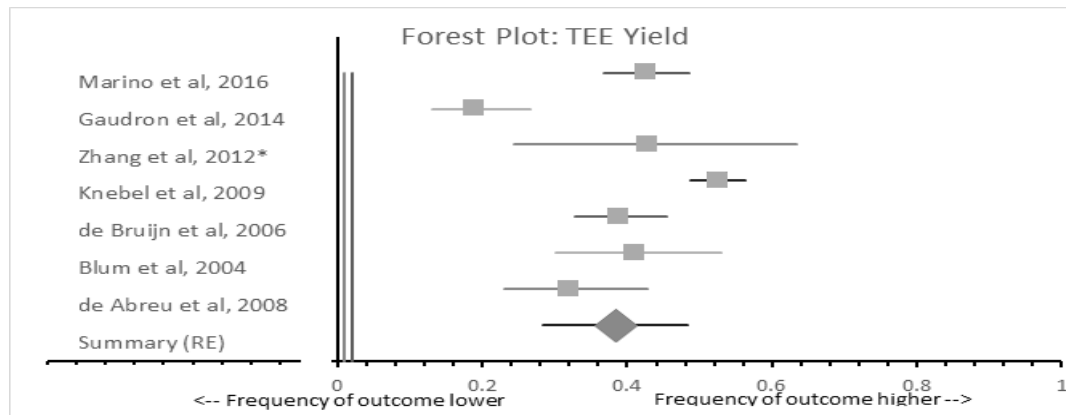

**Supplemental file 1.7: Forest plot of proportion of cardiac abnormalities that did change management in class II studies**

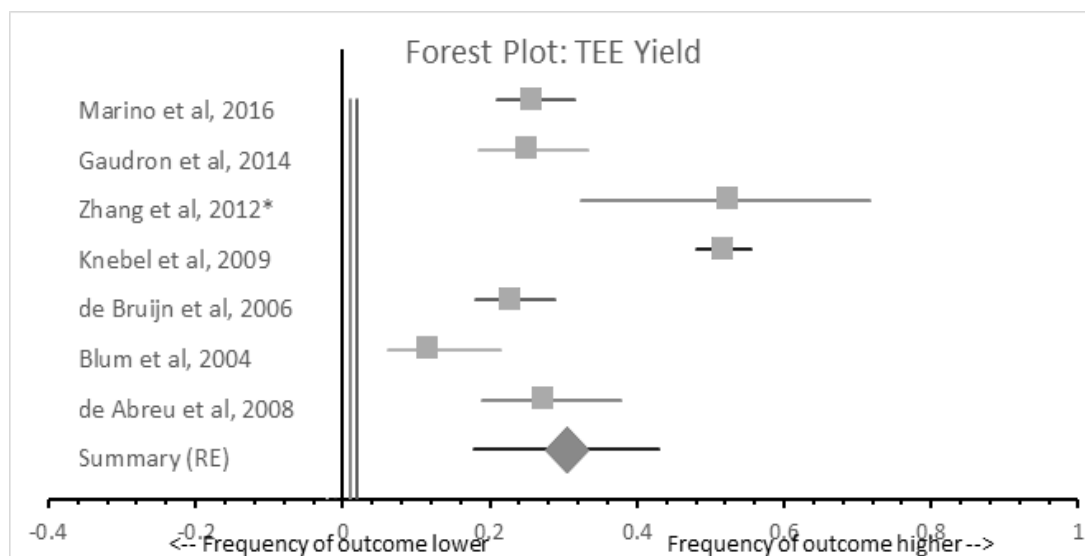

**Supplemental file 1.8: Forest plot of proportion of cardiac abnormalities that should change management in class II studies**

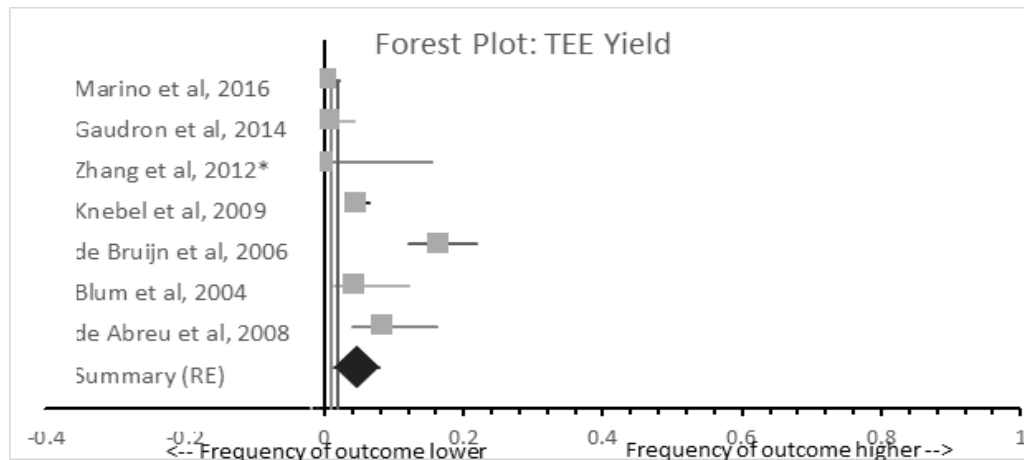

**Supplemental file 1.9: Forest plot of proportion of cardiac abnormalities that could change management in class II study.**

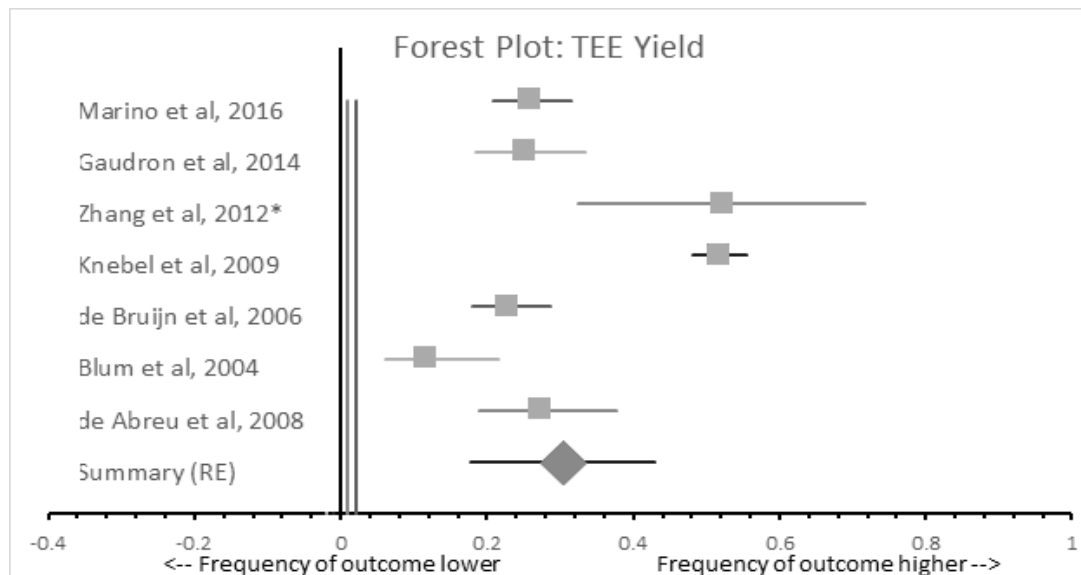

Supplement: s1 [file s1]
